# Supplementary material for: Emergence of High Pathogenicity Avian Influenza Virus H5N1 Clade 2.3.4.4b in Wild Birds and Poultry in Botswana
Source: MDPI journal article supplement (doi:10.3390/v14122601), 2022-11-22
Supplement: s1 [file s1]

**SI Table 1.** Overview of HPAI surveillance cases submitted to BNVL for post-mortem examination in response to the HPAI state of high alertness and the HPAI outbreaks in Botswana. Samples testing positive are indicated.

| Date Reported | BNVL Submission No. 2021/ | Species            | Location                 | Status                                   |
|---------------|---------------------------|--------------------|--------------------------|------------------------------------------|
|               |                           |                    |                          | Found Dead/in extremis/terminated/ live? |
| 08/04/2021    | 818                       | Duck               | Selebi-Phikwe            | Found Dead- NEGATIVE                     |
| 08/04/2021    | 909                       | Chicken            | Tonota Molapo, Palapye   | Found Dead- NEGATIVE                     |
| 09/04/2021    | 837                       | Duck               | Goodhope                 | Found Dead- NEGATIVE                     |
| 22/04/2021    | 915                       | Chicken            | Ramotswa                 | Found Dead- NEGATIVE                     |
| 06/05/2021    | 1047                      | Chicken            | Tutume East              | Found Dead- NEGATIVE                     |
| 12/05/2021    | 1106                      | Guinea Fowl        | Rabotsiripa, Gaborone    | Found Dead- NEGATIVE                     |
| 21/05/2021    | 1171                      | Chicken            | Sebele, Gaborone         | Found Dead- NEGATIVE                     |
| 25/05/2021    | 1313                      | Dove               | Hukuntsi                 | Found Dead- NEGATIVE                     |
| 03/06/2021    | 1312                      | Chicken            | Bokaa                    | Found Dead- NEGATIVE                     |
| 04/06/2021    | 1338                      | African Fish Eagle | Habu                     | Found Dead- <b>POSITIVE</b>              |
| 07/06/2021    | 1336                      | Wild bird          | Ditshwanye, Mochudi      | Live- NEGATIVE                           |
| 09/06/2021    | 1355                      | Chicken            | Gakuto                   | Found Dead- NEGATIVE                     |
| 11/06/2021    | 1367                      | Chicken            | Mochudi                  | Found Dead- NEGATIVE                     |
| 17/06/2021    | 1423                      | Chicken; Wild bird | Notwane                  | Found Dead; Live- NEGATIVE               |
| 17/06/2021    | 1504                      | Wild Bird          | Sehithwa                 | Live- NEGATIVE                           |
| 17/06/2021    | 1511                      | Chicken            | Moshopha, Mahalapye      | Found Dead- NEGATIVE                     |
| 22/06/2021    | 1548                      | Chicken            | Sekotlo (Mathubudikwane) | Live- NEGATIVE                           |
| 23/06/2021    | 1538                      | Chicken            | Kgalapitse, Mochudi      | Live- NEGATIVE                           |
| 24/06/2021    | 1552                      | Chicken            | Poloka                   | Live- NEGATIVE                           |
| 24/06/2021    | 1553                      | Chicken            | Leshibitse               | Live- NEGATIVE                           |
| 24/06/2021    | 1568                      | Chicken            | Metsimatale Dam, Kanye   | Live- NEGATIVE                           |
| 24/06/2021    | 1569                      | Chicken            | Jabula Dam, Kanye        | Live- NEGATIVE                           |
| 25/06/2021    | 1567                      | Chicken            | Bokaa                    | Live- NEGATIVE                           |
| 24/06/2021    | 1570                      | Chicken            | Maruswa Dam, Kanye       | Live- NEGATIVE                           |
| 24/06/2021    | 1573                      | Chicken            | Mmamankge, Kanye         | Live- NEGATIVE                           |
| 25/06/2021    | 1571                      | Guinea Fowl        | Gasita, Kanye            | Found Dead- NEGATIVE                     |
| 25/06/2021    | 1572                      | Chicken            | Mosadimogolo, Kanye      | Live- NEGATIVE                           |
| 29/06/2021    | 1594                      | Wild Birds         | Artesia                  | Live- NEGATIVE                           |
| 29/06/2021    | 1595                      | Wild Birds         | Kaudwane                 | Live- NEGATIVE                           |
| 29/06/2021    | 1663                      | Chicken            | Nokaneng                 | Found Dead- NEGATIVE                     |
| 05/07/2021    | 1652                      | Chicken            | Tshipasetena, Mochudi    | Found Dead- NEGATIVE                     |
| 06/07/2021    | 1674                      | Chicken            | Shakawe                  | Found Dead- NEGATIVE                     |
| 08/07/2021    | 1697                      | Wild Bird          | NC 26, Maun              | Live- NEGATIVE                           |

|            |      |                                  |                              |                                     |
|------------|------|----------------------------------|------------------------------|-------------------------------------|
| 09/07/2021 | 1693 | Chicken                          | Sunnyside, Lobatse           | Found Dead- NEGATIVE                |
| 09/07/2021 | 1694 | Wild Bird                        | Peleng Dam,<br>Lobatse       | Live- NEGATIVE                      |
| 12/07/2021 | 1767 | Duck                             | Di Stance, Selebi-<br>Phikwe | Found Dead- NEGATIVE                |
| 13/07/2021 | 1709 | Chicken                          | Gaborone North               | Live- NEGATIVE                      |
| 13/07/2021 | 1770 | Chicken                          | Mmamanaku,<br>Selebi-Phikwe  | Found Dead- NEGATIVE                |
| 15/07/2021 | 1834 | Chicken                          | Palapye                      | Found Dead- NEGATIVE                |
| 26/07/2021 | 1787 | Orpington<br>backyard<br>Chicken | Bokaa                        | Found Dead - <b>POSITIVE</b>        |
| 05/08/2021 | 1924 | Dove; Guinea<br>Fowl             | Habu                         | Found Dead- NEGATIVE                |
| 09/08/2021 | 1975 | Wild bird                        | Lake Ngami, Maun             | Live- NEGATIVE                      |
| 18/08/2021 | 2096 | Chicken                          | Etsha 13                     | Found Dead - <b>POSITIVE</b>        |
| 18/08/2021 | 2097 | Dove                             | Sedie                        | Found Dead - <b>POSITIVE</b>        |
| 20/08/2021 | 2040 | Chicken                          | Bosele ward,<br>Ghanzi       | Found Dead- NEGATIVE                |
| 26/08/2021 | 2163 | Chicken                          | Gumare                       | Found Dead - <b>POSITIVE</b>        |
| 27/08/2021 | 2125 | Chicken                          | Bokaa                        | Found Dead- NEGATIVE                |
| 27/08/2021 | 2152 | Chicken                          | Mochudi                      | Found Dead- NEGATIVE                |
| 31/08/2021 | 2145 | Chicken                          | Lobatse                      | Found Dead- NEGATIVE                |
| 31/08/2021 | 2162 | Chicken                          | Maun                         | Found Dead- NEGATIVE                |
| 01/09/2021 | 2180 | Chicken                          | Mochudi                      | Found Dead; Terminated-<br>NEGATIVE |
| 01/09/2021 | 2181 | Chicken                          | Mochudi                      | Found Dead; Terminated-<br>NEGATIVE |
| 02/09/2021 | 2185 | Chicken                          | Artesia                      | Terminated- NEGATIVE                |
| 02/09/2021 | 2186 | Chicken                          | Mochudi                      | Found Dead- NEGATIVE                |
| 02/09/2021 | 2187 | Chicken                          | Mochudi                      | Found Dead; Terminated-<br>NEGATIVE |
| 03/09/2021 | 2198 | Chicken                          | Phala Camp,<br>Mochudi       | Terminated- NEGATIVE                |
| 03/09/2021 | 2199 | Wild bird                        | Kgomodiatshaba               | Live- NEGATIVE                      |
| 03/09/2021 | 2200 | Wild bird                        | Kgomodiatshaba               | Live- NEGATIVE                      |
| 03/09/2021 | 2201 | Chicken                          | Gaborone                     | Found Dead; Live-<br>NEGATIVE       |
| 07/09/2021 | 2228 | Chicken                          | Mmapula, Mochudi             | Found Dead; Live-<br>NEGATIVE       |
| 07/09/2021 | 2229 | Chicken                          | Sewelo, Mochudi              | Found Dead- NEGATIVE                |
| 07/09/2021 | 2230 | Chicken                          | Pilane                       | Found Dead- NEGATIVE                |
| 07/09/2021 | 2231 | Chicken                          | Boseja, Mochudi              | Found Dead- NEGATIVE                |
| 07/09/2021 | 2249 | Chicken                          | Tsabong                      | Found Dead- NEGATIVE                |
| 08/09/2021 | 2240 | Chicken                          | Maun                         | Found Dead- NEGATIVE                |
| 08/09/2021 | 2245 | Chicken                          | Mochudi                      | Found Dead- NEGATIVE                |
| 08/09/2021 | 2248 | Chicken                          | Shorobe                      | Found Dead - <b>POSITIVE</b>        |
| 09/09/2021 | 2255 | Chicken                          | Sewelo, Mochudi              | Terminated- NEGATIVE                |
| 09/09/2021 | 2231 | Chicken                          | Maun                         | Found Dead- NEGATIVE                |
| 09/09/2021 | 2332 | Chicken                          | Mohembo                      | Found Dead- NEGATIVE                |
| 10/09/2021 | 2269 | Chicken                          | Gabane                       | Found Dead- NEGATIVE                |
| 13/09/2021 | 2289 | Chicken                          | Mochudi                      | Terminated- NEGATIVE                |

|            |      |         |                   |                                      |
|------------|------|---------|-------------------|--------------------------------------|
| 13/09/2021 | 2291 | Chicken | Mochudi           | Terminated- NEGATIVE                 |
| 13/09/2021 | 2333 | Chicken | Etsha 9           | Found Dead- NEGATIVE                 |
| 13/09/2021 | 2334 | Dove    | Etsha 13          | Found Dead - <b>POSITIVE</b>         |
| 13/09/2021 | 2348 | Chicken | Seronga           | Found Dead- NEGATIVE                 |
| 14/09/2021 | 2368 | Chicken | Gumare            | Found Dead- NEGATIVE                 |
| 14/09/2021 | 2387 | Chicken | Letsepa, Hukuntsi | Found Dead- NEGATIVE                 |
| 16/09/2021 | 2355 | Chicken | Maun              | Found Dead- NEGATIVE                 |
| 16/09/2021 | 2366 | Chicken | Dalana, Maun      | Found Dead- NEGATIVE                 |
| 16/09/2021 | 2396 | Chicken | Etsha 5           | Found Dead- NEGATIVE                 |
| 17/09/2021 | 2349 | Chicken | Oodi              | Found Dead- NEGATIVE                 |
| 17/09/2021 | 2350 | Chicken | Gaborone          | Found Dead- NEGATIVE                 |
| 17/09/2021 | 2369 | Chicken | Shorobe           | Found Dead- NEGATIVE                 |
| 17/09/2021 | 2397 | Chicken | Etsha 13          | Found Dead- NEGATIVE                 |
| 18/09/2021 | 2398 | Chicken | Gumare            | Found Dead- NEGATIVE                 |
| 18/09/2021 | 2399 | Chicken | Etsha 11          | Found Dead- NEGATIVE                 |
| 18/09/2021 | 2400 | Chicken | Bothatogo, Maun   | Found Dead- NEGATIVE                 |
| 18/09/2021 | 2401 | Chicken | Etsha 6           | Found Dead- NEGATIVE                 |
| 18/09/2021 | 2402 | Chicken | Etsha 13          | Found Dead- NEGATIVE                 |
| 20/09/2021 | 2365 | Dove    | Nokaneng          | Found Dead- NEGATIVE                 |
| 21/09/2021 | 2411 | Chicken | Mmashoro          | Found Dead; In Extremis-<br>NEGATIVE |
| 21/09/2021 | 2415 | Chicken | Mankgodi          | Found Dead- NEGATIVE                 |
| 24/09/2021 | 2466 | Chicken | Mmantsie          | Found Dead- NEGATIVE                 |
| 24/09/2021 | 2467 | Chicken | Lentsweletau      | Found Dead- NEGATIVE                 |
| 24/09/2021 | 2469 | Chicken | Etsha 5           | Found Dead- NEGATIVE                 |
| 24/09/2021 | 2470 | Chicken | Etsha 5           | Found Dead- NEGATIVE                 |
| 24/09/2021 | 2471 | Chicken | Shorobe           | Found Dead- NEGATIVE                 |
| 24/09/2021 | 2472 | Chicken | Xhaxhao           | Found Dead- NEGATIVE                 |
| 24/09/2021 | 2476 | Chicken | Shorobe           | Found Dead- NEGATIVE                 |
| 27/09/2021 | 2511 | Chicken | Maun              | Found Dead- NEGATIVE                 |
| 27/09/2021 | 2512 | Chicken | Habu              | Found Dead- NEGATIVE                 |
| 28/09/2021 | 2530 | Chicken | Jwaneng           | Found Dead- NEGATIVE                 |
| 29/09/2021 | 2538 | Geese   | Mochudi           | Found Dead- NEGATIVE                 |
| 29/09/2021 | 2539 | Duck    | Tlokweng          | Found Dead- NEGATIVE                 |
