# Supplementary figures and images for: Emergence of High Pathogenicity Avian Influenza Virus H5N1 Clade 2.3.4.4b in Wild Birds and Poultry in Botswana
Source: MDPI journal article supplement (doi:10.3390/v14122601), 2022-11-22

Key

Botswana H5N1 June 2021 – September 2021

Eurasian H5N1 2020/2021

African H5N1 December 2020 – December 2021

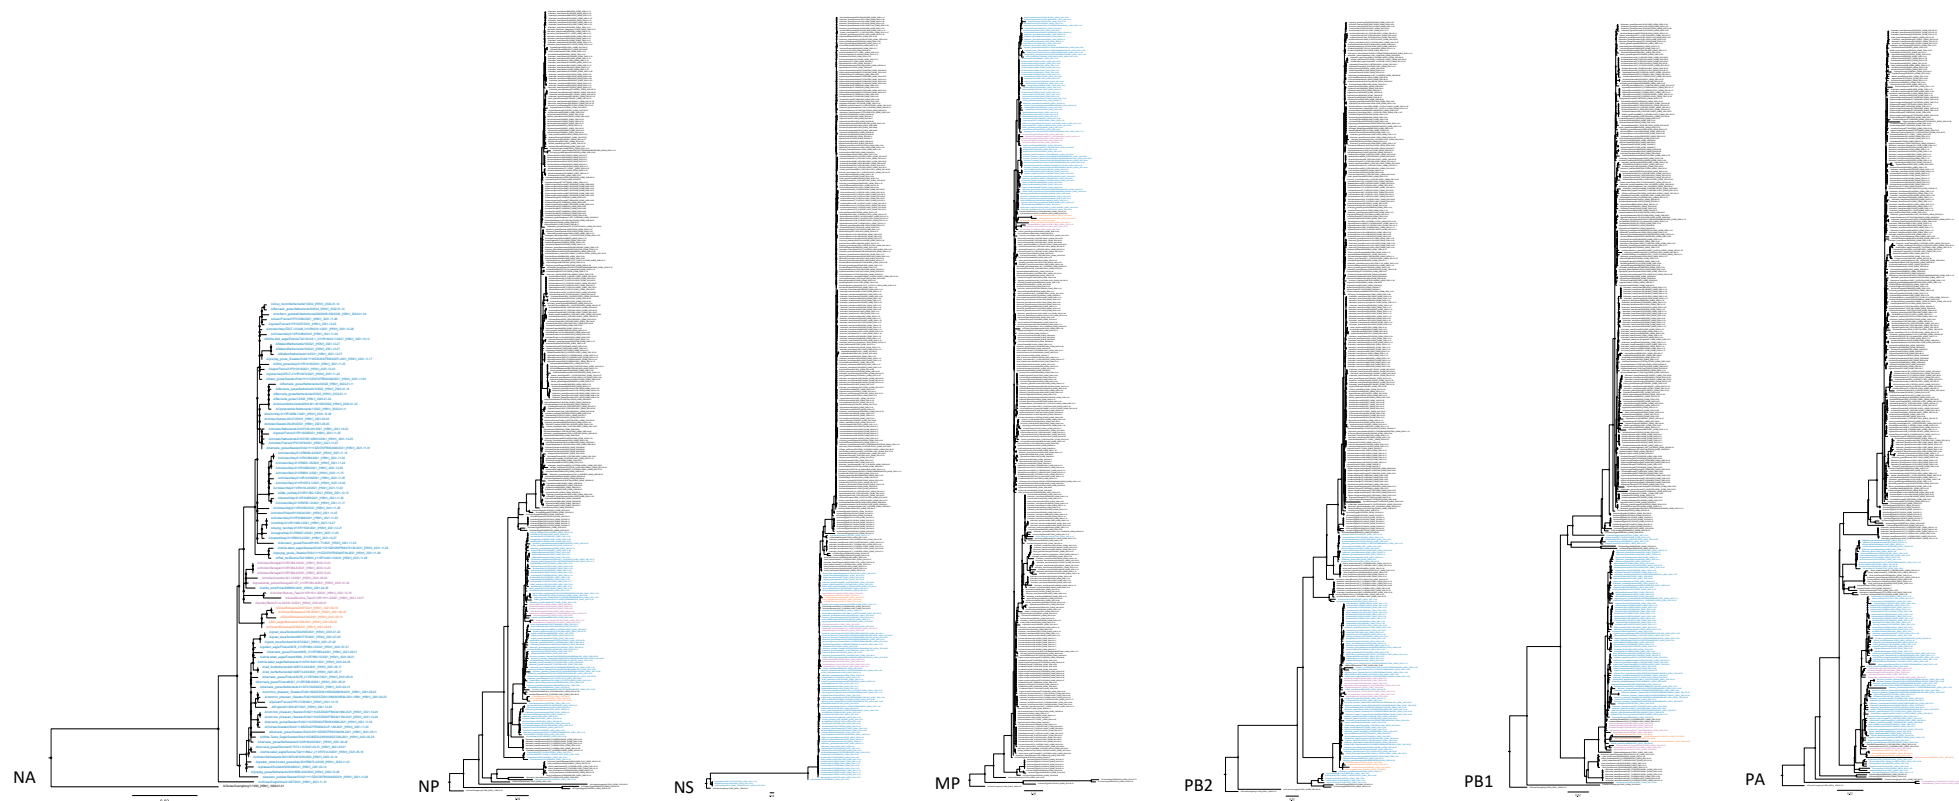

Supplement: s1 [file s1]
